# Supplementary material
Source: Elsevier journal article supplement (https://www.sciencedirect.com/science/article/pii/S2531043722002203)
Supplement: mmc1 [file S2531043722002203:mmc1.docx]

Supplemental table 1 Primers of four SNPs in *TLR2* and *TLR9* genes

| SNP | 1st-PCRP | 2nd-PCRP | UEP_SEQ |
| --- | --- | --- | --- |
| rs352140 | ACGTTGGATGATAAGCTGGACCTCTACCAC | ACGTTGGATGTGGCTGTTGTAGCTGAGGTC | agcgGAGGTCCAGGGCCTCCAGTCG |
| rs3804099 | ACGTTGGATGTATGCTGCTTCATATGAAGG | ACGTTGGATGGATCTACAGAGCTATGAGCC | AAAAGTTTGAAGTCAATTCAGAA |
| rs3804100 | ACGTTGGATGTTCCAGTGTCTTGGGAATGC | ACGTTGGATGTGCCTGAAACTTGTCAGTGG | tAGCACACGAATACACAG |
| rs5743705 | ACGTTGGATGGTCCAGTTCATACTTGCACC | ACGTTGGATGACTCCATTGAAAAGAGCCAC | acTGTGCTTTCTGAAAACTT |

SNP: single nucleotide polymorphism; PCR: polymerase chain reaction; UEP: unextended mini-sequencing primer.
